# Supplementary material
Source: Research Square preprint supplement (doi:10.21203/rs.3.rs-9187264/v1)
Supplement: Supplementary file 1 [file f5fbb6758147da96e6a507b2.docx]

# **SUPPLEMENTARY MATERIALS**


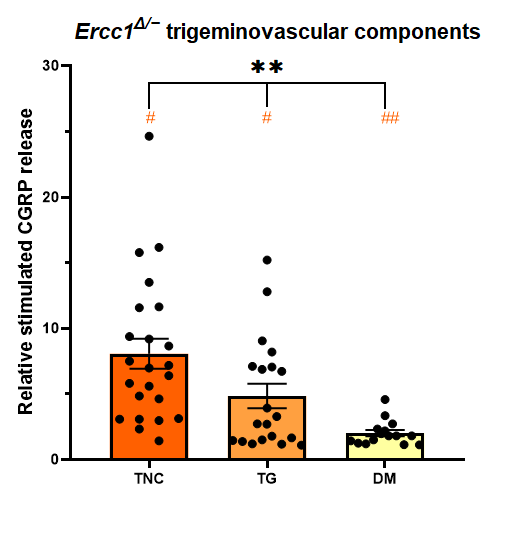


**Supplemental figure 1** – Bar plots with the mean ± SEM of the relative stimulated calcitonin gene-related peptide (CGRP) release ratios of the trigeminal nucleus caudalis (TNC, n = 23), trigeminal ganglion (TG, n = 20), and dura mater (DM, n = 15) after potassium chloride (KCl) administration in *Ercc1Δ/−* mice, indicating overall significant differences between the three groups (****** indicates overall *P*-value < 0.0001).

Post-hoc tests indicated significant differences between TNC *versus* TG and TNC *versus* DM, but not between TG *versus* DM. # indicates statistical significance with an adjusted *P*-value < 0.05 of TNC *versus* TG, while ## indicates statistical significance with an adjusted *P*-value < 0.0001 of TNC *versus* DM.


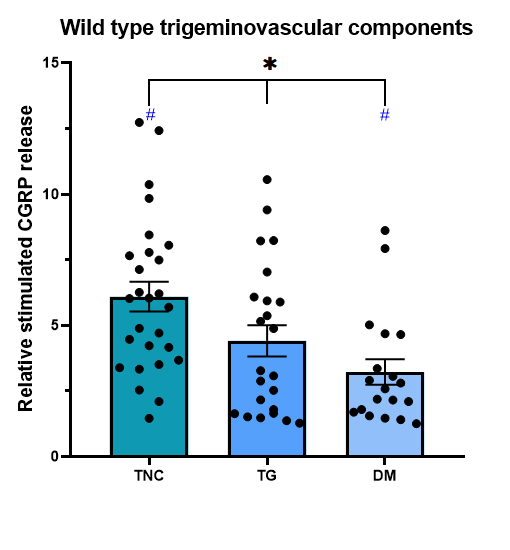


**Supplemental figure 2** – Bar plots with the mean ± SEM of the relative stimulated calcitonin gene-related peptide (CGRP) release ratios of the trigeminal nucleus caudalis (TNC, n = 27), trigeminal ganglion (TG, n = 23), and dura mater (DM, n = 19) after potassium chloride (KCl) administration in wild type mice, indicating overall significant differences between the three groups (***** indicates overall *P*-value < 0.05).

Post-hoc tests indicated significant differences between TNC *versus* DM, but not between TNC *versus* TG nor between TG *versus* DM. # indicates statistical significance with an adjusted *P*-value < 0.05.


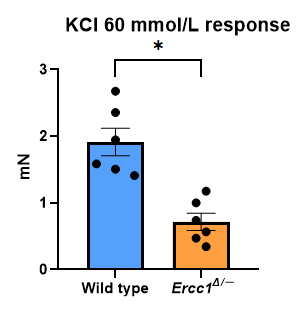


**Supplemental figure 3** – Bar plot with the mean ± SEM contractile responses to 60 mmol/L potassium chloride (KCl) of coronaries in wild type (n = 6) and *Ercc1Δ/−*mice (n = 6). An asterisk (*****) indicates a *P*-value < 0.05).


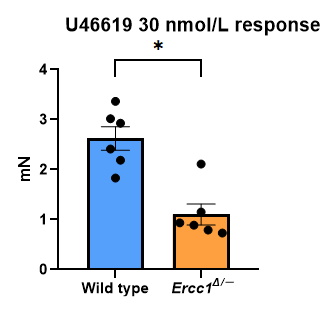


**Supplemental figure 4** – Bar plot with the mean ± SEM contractile responses to 30 nmol/L U46619 of coronaries in wild type (n = 6) and *Ercc1Δ/−*mice (n = 6). An asterisk (*****) indicates a *P*-value < 0.05).
